# Supplementary material
Source: PubMed Central journal article supplement (PMC4016771)
Supplement: NIHMS568433-supplement-01.pdf [file NIHMS568433-supplement-01.pdf]

Supplementary Figure 1S.

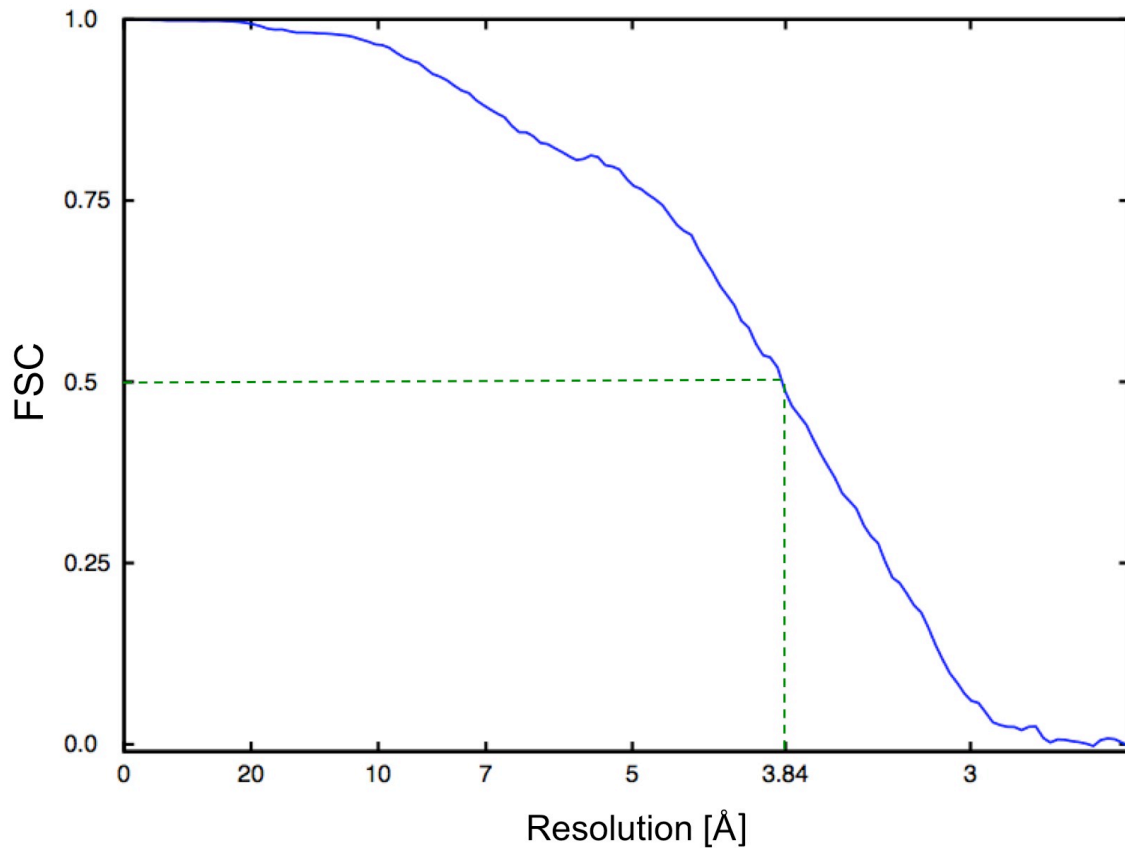

Fourier Shell Correlation (FSC) curve of a masked out 60S subunit of a structure of 80S ribosome determined using 35,198 projection images collected with a 300 kV Tecnai Polara (FEI) equipped with the K2 Summit DED camera.
